# Supplementary material for: Engineering Concanavalin B to Release Bioactive Peptides against Metabolic Syndrome
Source: MDPI journal article supplement (doi:10.3390/foods10071554), 2021-07-05
Supplement: s1 [file s1]

**Table S1.** Frequency of selected bioactive peptides in vegetable proteins and their **A** number.

|                               | Uniprot Entry | Sequence Lenght | IW | VW | VY | IY | EY | DG | IPI | GW | CG | DW | DE | Total | A     |
|-------------------------------|---------------|-----------------|----|----|----|----|----|----|-----|----|----|----|----|-------|-------|
| <b>Soy</b>                    |               |                 |    |    |    |    |    |    |     |    |    |    |    |       |       |
| $\beta$ -conglitin chain alfa | P11827        | 617             | 0  | 0  | 0  | 1  | 0  | 0  | 0   | 0  | 0  | 0  | 6  | 7     | 0.011 |
| $\beta$ -conglitin chain beta | P25974        | 426             | 0  | 0  | 0  | 1  | 0  | 0  | 0   | 0  | 0  | 0  | 2  | 3     | 0.007 |
| Albumin 2S                    | P19594        | 137             | 0  | 0  | 0  | 0  | 0  | 0  | 0   | 0  | 0  | 0  | 2  | 2     | 0.015 |
| Basic 7S Globulin             | P13917        | 403             | 0  | 1  | 1  | 0  | 1  | 1  | 0   | 0  | 1  | 0  | 0  | 5     | 0.012 |
| <b>Amaranth</b>               |               |                 |    |    |    |    |    |    |     |    |    |    |    |       |       |
| 11S Globulin                  | Q38712        | 501             | 0  | 1  | 1  | 2  | 1  | 1  | 0   | 0  | 0  | 0  | 2  | 8     | 0.016 |
| <b>Oat</b>                    |               |                 |    |    |    |    |    |    |     |    |    |    |    |       |       |
| Avenin 3                      | P80356        | 201             | 0  | 0  | 1  | 0  | 0  | 0  | 0   | 0  | 0  | 0  | 0  | 1     | 0.005 |
| 11S Globulin                  | Q38780        | 503             | 0  | 0  | 2  | 2  | 1  | 1  | 0   | 0  | 0  | 0  | 2  | 8     | 0.016 |
| <b>Beans</b>                  |               |                 |    |    |    |    |    |    |     |    |    |    |    |       |       |
| Phaseolin                     | P80463        | 404             | 0  | 0  | 2  | 1  | 0  | 0  | 0   | 0  | 0  | 0  | 0  | 3     | 0.007 |
| Globulin-1                    | A6YNT0        | 224             | 0  | 0  | 0  | 0  | 0  | 1  | 0   | 0  | 0  | 0  | 2  | 3     | 0.013 |
| Alpha-zein 16                 | P04700        | 242             | 0  | 0  | 1  | 0  | 0  | 0  | 0   | 0  | 0  | 0  | 0  | 1     | 0.004 |
| Gamma-zein                    | C0P381        | 267             | 0  | 0  | 0  | 1  | 0  | 0  | 0   | 0  | 2  | 0  | 0  | 3     | 0.011 |
| <b>Rice</b>                   |               |                 |    |    |    |    |    |    |     |    |    |    |    |       |       |
| Prolamin PPROLINE 4E          | Q0DJ45        | 131             | 0  | 1  | 0  | 1  | 0  | 0  | 0   | 0  | 0  | 0  | 0  | 2     | 0.015 |
| Cupincin                      | B8AL97        | 436             | 0  | 0  | 1  | 0  | 1  | 0  | 0   | 0  | 0  | 0  | 5  | 7     | 0.016 |
| Globulin                      | P29835        | 164             | 0  | 0  | 0  | 0  | 1  | 0  | 0   | 1  | 0  | 0  | 0  | 2     | 0.012 |
| Glutelin                      | Q6T725        | 471             | 0  | 0  | 3  | 1  | 2  | 2  | 0   | 0  | 0  | 0  | 3  | 11    | 0.023 |
| Glutelin Type A-2             | P07730        | 475             | 0  | 0  | 3  | 1  | 0  | 1  | 0   | 0  | 0  | 0  | 3  | 8     | 0.017 |
| Glutelin Type B-2             | Q02897        | 481             | 0  | 0  | 4  | 1  | 1  | 2  | 0   | 0  | 0  | 0  | 2  | 10    | 0.021 |
| <b>Maize</b>                  |               |                 |    |    |    |    |    |    |     |    |    |    |    |       |       |
| Globulin-1 S Allele           | P15590        | 487             | 0  | 0  | 0  | 0  | 0  | 1  | 0   | 0  | 0  | 0  | 2  | 3     | 0.006 |
| 22 kDa alpha zein 4           | O48966        | 245             | 0  | 0  | 0  | 0  | 0  | 0  | 0   | 0  | 0  | 0  | 0  | 0     | 0.000 |
| 50 kDa gamma zein             | C0P381        | 267             | 0  | 0  | 0  | 1  | 0  | 0  | 0   | 0  | 2  | 0  | 0  | 3     | 0.011 |
| Globulin-2                    | Q7M1Z8        | 431             | 0  | 0  | 1  | 0  | 0  | 0  | 0   | 0  | 0  | 0  | 3  | 4     | 0.009 |
| Globulin-1                    | A6YNT0        | 224             | 0  | 0  | 0  | 0  | 0  | 1  | 0   | 0  | 0  | 0  | 2  | 3     | 0.013 |

|                                  |            |     |   |   |   |   |   |   |   |   |   |   |   |    |       |       |
|----------------------------------|------------|-----|---|---|---|---|---|---|---|---|---|---|---|----|-------|-------|
| <b>18 kD delta zein</b>          | Q946V9     | 190 | 0 | 0 | 0 | 0 | 0 | 0 | 0 | 0 | 0 | 0 | 0 | 0  | 0     | 0.000 |
| <b>Prolamin PPROL 17</b>         | B6UH22     | 164 | 0 | 0 | 1 | 0 | 0 | 0 | 0 | 0 | 3 | 0 | 0 | 4  | 0.024 |       |
| <b>Chickpea</b>                  |            |     |   |   |   |   |   |   |   |   |   |   |   |    |       |       |
| <b>Legumin</b>                   | Q9SMJ4     | 475 | 1 | 0 | 0 | 1 | 0 | 1 | 0 | 0 | 0 | 0 | 7 | 10 | 0.021 |       |
| <b>Globulin-1 S Allele</b>       | A0A1S2YZ56 | 621 | 0 | 0 | 0 | 1 | 1 | 2 | 0 | 1 | 1 | 0 | 3 | 9  | 0.014 |       |
| <b>11S Globulin seed storage</b> | A0A1S2YGT3 | 348 | 1 | 1 | 2 | 0 | 0 | 2 | 0 | 0 | 0 | 0 | 1 | 7  | 0.020 |       |
| <b>Glutelin Type-A 2-Like</b>    | A0A1S2YJV5 | 200 | 0 | 1 | 1 | 0 | 0 | 4 | 0 | 0 | 0 | 0 | 0 | 6  | 0.030 |       |
| <b>Lentil</b>                    |            |     |   |   |   |   |   |   |   |   |   |   |   |    |       |       |
| <b>Albumin S</b>                 | P86782     | 37  | 0 | 0 | 0 | 0 | 0 | 0 | 0 | 0 | 0 | 0 | 0 | 0  | 0.000 |       |
| <b>Jack bean</b>                 |            |     |   |   |   |   |   |   |   |   |   |   |   |    |       |       |
| <b>Concanavalina B</b>           | P46347     | 299 | 0 | 0 | 3 | 0 | 2 | 2 | 0 | 0 | 1 | 0 | 2 | 10 | 0.033 |       |
| <b>Broad Bean</b>                |            |     |   |   |   |   |   |   |   |   |   |   |   |    |       |       |
| <b>Legumin type B</b>            | P05190     | 462 | 0 | 0 | 0 | 2 | 2 | 1 | 0 | 0 | 0 | 0 | 1 | 6  | 0.013 |       |
| <b>Vicilin</b>                   | P08438     | 436 | 0 | 0 | 0 | 1 | 2 | 0 | 0 | 0 | 0 | 0 | 2 | 5  | 0.011 |       |
| <b>Convicilin</b>                | B0BCL8     | 469 | 0 | 0 | 0 | 0 | 1 | 0 | 0 | 0 | 0 | 0 | 4 | 5  | 0.011 |       |
| <b>Wheat</b>                     |            |     |   |   |   |   |   |   |   |   |   |   |   |    |       |       |
| <b>Glutenin subunit DX5</b>      | P10388     | 827 | 0 | 0 | 0 | 0 | 0 | 0 | 0 | 0 | 0 | 0 | 0 | 0  | 0.000 |       |
| <b>Avenin-like B1</b>            | Q2A783     | 267 | 0 | 0 | 0 | 2 | 0 | 0 | 0 | 0 | 0 | 0 | 0 | 2  | 0.007 |       |
| <b>Alpha/Beta Gliadin</b>        | P02863     | 266 | 0 | 0 | 1 | 0 | 0 | 0 | 0 | 0 | 0 | 0 | 0 | 1  | 0.004 |       |
| <b>Alpha/Beta Gliadin A-I</b>    | P04721     | 242 | 0 | 0 | 0 | 0 | 0 | 0 | 0 | 0 | 0 | 0 | 0 | 0  | 0.000 |       |
| <b>Alpha/Beta Gliadin A-II</b>   | P04722     | 271 | 0 | 0 | 1 | 0 | 0 | 0 | 0 | 0 | 0 | 0 | 0 | 1  | 0.004 |       |
| <b>Alpha/Beta Gliadin A-III</b>  | P04723     | 262 | 0 | 0 | 1 | 0 | 0 | 0 | 0 | 0 | 0 | 0 | 0 | 1  | 0.004 |       |
| <b>Alpha/Beta Gliadin A-IV</b>   | P04724     | 277 | 0 | 0 | 1 | 0 | 0 | 0 | 0 | 0 | 0 | 0 | 0 | 1  | 0.004 |       |
| <b>Alpha/Beta Gliadin A-V</b>    | P04725     | 299 | 0 | 0 | 1 | 0 | 0 | 0 | 0 | 0 | 0 | 0 | 0 | 1  | 0.003 |       |
| <b>Glutelin Type A-1</b>         | M7ZVJ6     | 299 | 0 | 1 | 0 | 0 | 0 | 3 | 0 | 0 | 1 | 1 | 0 | 6  | 0.020 |       |

Parameter A is the relative frequency of bioactive peptides that can treat metabolic syndrome.

**Table S2.** The 96 sequences of CNV with a total of 13 modifications generated.

|     |                                                                                                                                                                                                                                                                                                             |
|-----|-------------------------------------------------------------------------------------------------------------------------------------------------------------------------------------------------------------------------------------------------------------------------------------------------------------|
| 30. | DISSTEIAVYWGQRDGLLRDTCKTNKYKIVFISFLDKFGCEIRKPELELEGVCGPSVGNPCSFLESQIKECQRMGVKVFALGGPKGTYSACSADYAKDLAEYLHTYFLSERREGPLGKVLDGHHFDIQK<br>PDELWDNLLLEYLYQIKVYQSTFLLSAAPGCLSDEYLDNAIQTRHFDYIFVRVYNDRSCQYSTGNIQRIRNAWLWTKSVYPRDWNLFLELPASQATAPGGGYIPPSALIQVLVYLPDLQTRYAGIAL<br>WNRQADKETGYSTNIIRYLNATAMPFTSNLLKYPS |
| 31. | DISSTEIAVYWGQRDGLLRDTCKTNKYKIVFISFLDKFGCEIRKPELELEGVCGPSVGNPCSFLESQIKECQRMGVKVFALGGPKGTYSACSADYAKDLAEYLHTYFLSERREGPLGKVLDGHHFDIQK<br>PDELWDNLLLEYLYQIKVYQSTFLLSAAPGCLSDEYLDNAIQTRHFDYIFVRVYNDRSCQYSTGNIQRIRNAWLWTKSVYPRDWNLFLELPASQATAPGGGYIPPSALIQVLVYLPDLQTRYAGIAL<br>WNRQADKETGYSTNIIRYLNATAMPFTSNLLKYPS |
| 32. | DISSTEIAVYWGQRDGLLRDTCKTNKYKIVFISFLDKFGCEIRKPELELEGVCGPSVGNPCSFLESQIKECQRMGVKVFALGGPKGTYSACSADYAKDLAEYLHTYFLSERREGPLGKVLDGHHFDIQK<br>PDELWDNLLLEYLYQIKVYQSTFLLSAAPGCLSDEYLDNAIQTRHFDYIFVRVYNDRSCQYSTGNIQRIRNAWLWTKSVYPRDWNLFLELPASQATAPGGGYIPPSALIQVLVYLPDLQTRYAGIAL<br>WNRQADKETGYSTNIIRYLNATAMPFTSNLLKYPS |
| 33. | DISSTEIAVYWGQRDGLLRDTCKTNKYKIVFISFLDKFGCEIRKPELELEGVCGPSVGNPCSFLESQIKECQRMGVKVFALGGPKGTYSACSADYAKDLAEYLHTYFLSERREGPLGKVLDGHHFDIQK<br>PDELWDNLLLEYLYQIKVYQSTFLLSAAPGCLSDEYLDNAIQTRHFDYIFVRVYNDRSCQYSTGNIQRIRNAWLWTKSVYPRDWNLFLELPASQATAPGGGYIPPSALIQVLVYLPDLQTRYAGIAL<br>WNRQADKETGYSTNIIRYLNATAMPFTSNLLKYPS |
| 34. | DISSTEIAVYWGQRDGLLRDTCKTNKYKIVFISFLDKFGCEIRKPELELEGVCGPSVGNPCSFLESQIKECQRMGVKVFALGGPKGTYSACSADYAKDLAEYLHTYFLSERREGPLGKVLDGHHFDIQK<br>PDELWDNLLLEYLYQIKVYQSTFLLSAAPGCLSDEYLDNAIQTRHFDYIFVRVYNDRSCQYSTGNIQRIRNAWLWTKSVYPRDWNLFLELPASQATAPGGGYIPPSALIQVLVYLPDLQTRYAGIAL<br>WNRQADKETGYSTNIIRYLNATAMPFTSNLLKYPS |
| 35. | DISSTEIAVYWGQRDGLLRDTCKTNKYKIVFISFLDKFGCEIRKPELELEGVCGPSVGNPCSFLESQIKECQRMGVKVFALGGPKGTYSACSADYAKDLAEYLHTYFLSERREGPLGKVLDGHHFDIQK<br>PDELWDNLLLEYLYQIKVYQSTFLLSAAPGCLSDEYLDNAIQTRHFDYIFVRVYNDRSCQYSTGNIQRIRNAWLWTKSVYPRDWNLFLELPASQATAPGGGYIPPSALIQVLVYLPDLQTRYAGIAL<br>WNRQADKETGYSTNIIRYLNATAMPFTSNLLKYPS |
| 36. | DISSTEIAVYWGQRDGLLRDTCKTNKYKIVFISFLDKFGCEIRKPELELEGVCGPSVGNPCSFLESQIKECQRMGVKVFALGGPKGTYSACSADYAKDLAEYLHTYFLSERREGPLGKVLDGHHFDIQK<br>PDELWDNLLLEYLYQIKVYQSTFLLSAAPGCLSDEYLDNAIQTRHFDYIFVRVYNDRSCQYSTGNIQRIRNAWLWTKSVYPRDWNLFLELPASQATAPGGGYIPPSALIQVLVYLPDLQTRYAGIAL<br>WNRQADKETGYSTNIIRYLNATAMPFTSNLLKYPS |
| 37. | DISSTEIAVYWGQRDGLLRDTCKTNKYKIVFISFLDKFGCEIRKPELELEGVCGPSVGNPCSFLESQIKECQRMGVKVFALGGPKGTYSACSADYAKDLAEYLHTYFLSERREGPLGKVLDGHHFDIQK<br>PDELWDNLLLEYLYQIKVYQSTFLLSAAPGCLSDEYLDNAIQTRHFDYIFVRVYNDRSCQYSTGNIQRIRNAWLWTKSVYPRDWNLFLELPASQATAPGGGYIPPSALIQVLVYLPDLQTRYAGIAL<br>WNRQADKETGYSTNIIRYLNATAMPFTSNLLKYPS |
| 38. | DISSTEIAVYWGQRDGLLRDTCKTNKYKIVFISFLDKFGCEIRKPELELEGVCGPSVGNPCSFLESQIKECQRMGVKVFALGGPKGTYSACSADYAKDLAEYLHTYFLSERREGPLGKVLDGHHFDIQK<br>PDELWDNLLLEYLYQIKVYQSTFLLSAAPGCLSDEYLDNAIQTRHFDYIFVRVYNDRSCQYSTGNIQRIRNAWLWTKSVYPRDWNLFLELPASQATAPGGGYIPPSALIQVLVYLPDLQTRYAGIA<br>LWNRQADKETGYSTNIIRYLNATAMPFTSNLLKYPS |
| 39. | DISSTEIAVYWGQRDGLLRDTCKTNKYKIVFISFLDKFGCEIRKPELELEGVCGPSVGNPCSFLESQIKECQRMGVKVFALGGPKGTYSACSADYAKDLAEYLHTYFLSERREGPLGKVLDGHHFDIQK<br>PDELWDNLLLEYLYQIKVYQSTFLLSAAPGCLSDEYLDNAIQTRHFDYIFVRVYNDRSCQYSTGNIQRIRNAWLWTKSVYPRDWNLFLELPASQATAPGGGYIPPSALIQVLVYLPDLQTRYAGIA<br>LWNRQADKETGYSTNIIRYLNATAMPFTSNLLKYPS |
| 40. | DISSTEIAVYWGQRDGLLRDTCKTNKYKIVFISFLDKFGCEIRKPELELEGVCGPSVGNPCSFLESQIKECQRMGVKVFALGGPKGTYSACSADYAKDLAEYLHTYFLSERREGPLGKVLDGHHFDIQK<br>PDELWDNLLLEYLYQIKVYQSTFLLSAAPGCLSDEYLDNAIQTRHFDYIFVRVYNDRSCQYSTGNIQRIRNAWLWTKSVYPRDWNLFLELPASQATAPGGGYIPPSALIQVLVYLPDLQTRYAGIA<br>LWNRQADKETGYSTNIIRYLNATAMPFTSNLLKYPS |
| 41. | DISSTEIAVYWGQRDGLLRDTCKTNKYKIVFISFLDKFGCEIRKPELELEGVCGPSVGNPCSFLESQIKECQRMGVKVFALGGPKGTYSACSADYAKDLAEYLHTYFLSERREGPLGKVLDGHHFDIQK<br>PDELWDNLLLEYLYQIKVYQSTFLLSAAPGCLSDEYLDNAIQTRHFDYIFVRVYNDRSCQYSTGNIQRIRNAWLWTKSVYPRDWNLFLELPASQATAPGGGYIPPSALIQVLVYLPDLQTRYAGIA<br>LWNRQADKETGYSTNIIRYLNATAMPFTSNLLKYPS |
| 42. | DISSTEIAVYWGQRDGLLRDTCKTNKYKIVFISFLDKFGCEIRKPELELEGVCGPSVGNPCSFLESQIKECQRMGVKVFALGGPKGTYSACSADYAKDLAEYLHTYFLSERREGPLGKVLDGHHFDIQK<br>PDELWDNLLLEYLYQIKVYQSTFLLSAAPGCLSDEYLDNAIQTRHFDYIFVRVYNDRSCQYSTGNIQRIRNAWLWTKSVYPRDWNLFLELPASQATAPGGGYIPPSALIQVLVYLPDLQTRYAGIAL<br>WNRQADKETGYSTNIIRYLNATAMPFTSNLLKYPS |

[illegible]

[illegible]

[illegible]

[illegible]



[illegible]



113. DISSTEIAVYWGQRDGLLRDTCKTNKYKIVFISFLDKFGCEIRKPELELEGVCGPSVGNPCSFLESQIKECQRMGVKVFLALGGPKGTYSACSADYAKDLAEYLHTYFLSERREGPLGKVYLDGTHFDIQK  
PDELEWDNLLLEYQIKVYQSTFLLSAAPGCLSEYLDNAIQTRHFDYIFVRVYNDRSCQYSTGNIQRIRNAWLWTKSVYPRDWNLFLELPASQATAPGGGYIPPSALINQVLVYLPDLQTRYAGIA  
LWNRQADKETGYSTNIIRYLNATAMPFTSNLLKYPS

114. DISSTEIAVYWGQRDGLLRDTCKTNKYKIVFISFLDKFGCEIRKPELELEGVCGPSVGNPCSFLESQIKECQRMGVKVFLALGGPKGTYSACSADYAKDLAEYLHTYFLSERREGPLGKVYLDGTHFDIQK  
PDELEWDNLLLEYQIKVYQSTFLLSAAPGCLSEYLDNAIQTRHFDYIFVRVYNDRSCQYSTGNIQRIRNAWLWTKSVYPRDWNLFLELPASQATAPGGGYIPPSALINQVLVYLPDLQTRYAGIA  
LWNRQADKETGYSTNIIRYLNATAMPFTSNLLKYPS

115. DISSTEIAVYWGQRDGLLRDTCKTNKYKIVFISFLDKFGCEIRKPELELEGVCGPSVGNPCSFLESQIKECQRMGVKVFLALGGPKGTYSACSADYAKDLAEYLHTYFLSERREGPLGKVYLDGTHFDIQK  
PDELEWDNLLLEYQIKVYQSTFLLSAAPGCLSEYLDNAIQTRHFDYIFVRVYNDRSCQYSTGNIQRIRNAWLWTKSVYPRDWNLFLELPASQATAPGGGYIPPSALINQVLVYLPDLQTRYAGIA  
LWNRQADKETGYSTNIIRYLNATAMPFTSNLLKYPS

116. DISSTEIAVYWGQRDGLLRDTCKTNKYKIVFISFLDKFGCEIRKPELELEGVCGPSVGNPCSFLESQIKECQRMGVKVFLALGGPKGTYSACSADYAKDLAEYLHTYFLSERREGPLGKVYLDGTHFDIQK  
PDELEWDNLLLEYQIKVYQSTFLLSAAPGCLSEYLDNAIQTRHFDYIFVRVYNDRSCQYSTGNIQRIRNAWLWTKSVYPRDWNLFLELPASQATAPGGGYIPPSALINQVLVYLPDLQTRYAGIA  
LWNRQADKETGYSTNIIRYLNATAMPFTSNLLKYPS

117. DISSTEIAVYWGQRDGLLRDTCKTNKYKIVFISFLDKFGCEIRKPELELEGVCGPSVGNPCSFLESQIKECQRMGVKVFLALGGPKGTYSACSADYAKDLAEYLHTYFLSERREGPLGKVYLDGTHFDIQK  
PDELEWDNLLLEYQIKVYQSTFLLSAAPGCLSEYLDNAIQTRHFDYIFVRVYNDRSCQYSTGNIQRIRNAWLWTKSVYPRDWNLFLELPASQATAPGGGYIPPSALINQVLVYLPDLQTRYAGIA  
LWNRQADKETGYSTNIIRYLNATAMPFTSNLLKYPS

118. DISSTEIAVYWGQRDGLLRDTCKTNKYKIVFISFLDKFGCEIRKPELELEGVCGPSVGNPCSFLESQIKECQRMGVKVFLALGGPKGTYSACSADYAKDLAEYLHTYFLSERREGPLGKVYLDGTHFDIQK  
PDELEWDNLLLEYQIKVYQSTFLLSAAPGCLSEYLDNAIQTRHFDYIFVRVYNDRSCQYSTGNIQRIRNAWLWTKSVYPRDWNLFLELPASQATAPGGGYIPPSALINQVLVYLPDLQTRYAGIA  
LWNRQADKETGYSTNIIRYLNATAMPFTSNLLKYPS

119. DISSTEIAVYWGQRDGLLRDTCKTNKYKIVFISFLDKFGCEIRKPELELEGVCGPSVGNPCSFLESQIKECQRMGVKVFLALGGPKGTYSACSADYAKDLAEYLHTYFLSERREGPLGKVYLDGTHFDIQK  
PDELEWDNLLLEYQIKVYQSTFLLSAAPGCLSEYLDNAIQTRHFDYIFVRVYNDRSCQYSTGNIQRIRNAWLWTKSVYPRDWNLFLELPASQATAPGGGYIPPSALINQVLVYLPDLQTRYAGIA  
LWNRQADKETGYSTNIIRYLNATAMPFTSNLLKYPS

120. DISSTEIAVYWGQRDGLLRDTCKTNKYKIVFISFLDKFGCEIRKPELELEGVCGPSVGNPCSFLESQIKECQRMGVKVFLALGGPKGTYSACSADYAKDLAEYLHTYFLSERREGPLGKVYLDGTHFDIQK  
PDELEWDNLLLEYQIKVYQSTFLLSAAPGCLSEYLDNAIQTRHFDYIFVRVYNDRSCQYSTGNIQRIRNAWLWTKSVYPRDWNLFLELPASQATAPGGGYIPPSALINQVLVYLPDLQTRYAGIA  
LWNRQADKETGYSTNIIRYLNATAMPFTSNLLKYPS

121. DISSTEIAVYWGQRDGLLRDTCKTNKYKIVFISFLDKFGCEIRKPELELEGVCGPSVGNPCSFLESQIKECQRMGVKVFLALGGPKGTYSACSADYAKDLAEYLHTYFLSERREGPLGKVYLDGTHFDIQK  
PDELEWDNLLLEYQIKVYQSTFLLSAAPGCLSEYLDNAIQTRHFDYIFVRVYNDRSCQYSTGNIQRIRNAWLWTKSVYPRDWNLFLELPASQATAPGGGYIPPSALINQVLVYLPDLQTRYAGIA  
LWNRQADKETGYSTNIIRYLNATAMPFTSNLLKYPS

122. DISSTEIAVYWGQRDGLLRDTCKTNKYKIVFISFLDKFGCEIRKPELELEGVCGPSVGNPCSFLESQIKECQRMGVKVFLALGGPKGTYSACSADYAKDLAEYLHTYFLSERREGPLGKVYLDGTHFDIQK  
PDELEWDNLLLEYQIKVYQSTFLLSAAPGCLSEYLDNAIQTRHFDYIFVRVYNDRSCQYSTGNIQRIRNAWLWTKSVYPRDWNLFLELPASQATAPGGGYIPPSALINQVLVYLPDLQTRYAGIA  
LWNRQADKETGYSTNIIRYLNATAMPFTSNLLKYPS

123. DISSTEIAVYWGQRDGLLRDTCKTNKYKIVFISFLDKFGCEIRKPELELEGVCGPSVGNPCSFLESQIKECQRMGVKVFLALGGPKGTYSACSADYAKDLAEYLHTYFLSERREGPLGKVYLDGTHFDIQK  
PDELEWDNLLLEYQIKVYQSTFLLSAAPGCLSEYLDNAIQTRHFDYIFVRVYNDRSCQYSTGNIQRIRNAWLWTKSVYPRDWNLFLELPASQATAPGGGYIPPSALINQVLVYLPDLQTRYAGIA  
LWNRQADKETGYSTNIIRYLNATAMPFTSNLLKYPS

124. DISSTEIAVYWGQRDGLLRDTCKTNKYKIVFISFLDKFGCEIRKPELELEGVCGPSVGNPCSFLESQIKECQRMGVKVFLALGGPKGTYSACSADYAKDLAEYLHTYFLSERREGPLGKVYLDGTHFDIQK  
PDELEWDNLLLEYQIKVYQSTFLLSAAPGCLSEYLDNAIQTRHFDYIFVRVYNDRSCQYSTGNIQRIRNAWLWTKSVYPRDWNLFLELPASQATAPGGGYIPPSALINQVLVYLPDLQTRYAGIA  
LWNRQADKETGYSTNIIRYLNATAMPFTSNLLKYPS

125. DISSTEIAVYWGQRDGLLRDTCKTNKYKIVFISFLDKFGCEIRKPELELEGVCGPSVGNPCSFLESQIKECQRMGVKVFLALGGPKGTYSACSADYAKDLAEYLHTYFLSERREGPLGKVYLDGTHFDIQK  
PDELEWDNLLLEYQIKVYQSTFLLSAAPGCLSEYLDNAIQTRHFDYIFVRVYNDRSCQYSTGNIQRIRNAWLWTKSVYPRDWNLFLELPASQATAPGGGYIPPSALINQVLVYLPDLQTRYAGIA  
LWNRQADKETGYSTNIIRYLNATAMPFTSNLLKYPS

The sequences showed in blue color are the 5 modified versions closer to native Concanavalin B (Stability, free folding energy and total contacts.

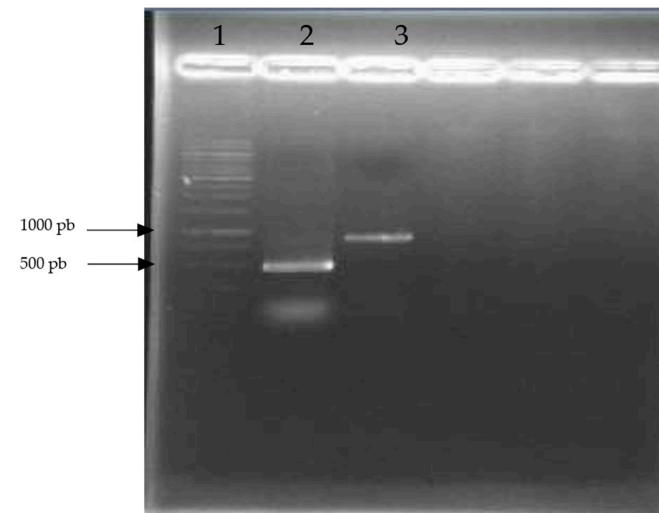

**Figure S1.** Agarose gel of the PCR product of concanavalin B extracted from leaves. Lane 1: Molecular marker, Lane 2: Positive control, Lane 3: product of PCR.

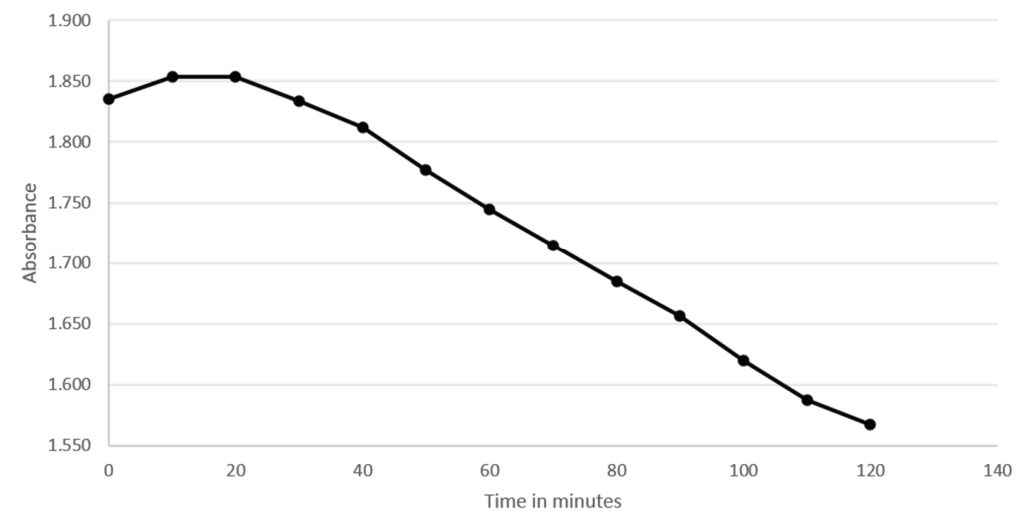

**Figure S2.** NADPH stability in phosphate buffer pH 7.4 and EDTA 200 mM.
